# Supplementary figures and images for: Evaluation of the BioFire FilmArray Pneumonia Panel Plus to the Conventional Diagnostic Methods in Determining the Microbiological Etiology of Hospital-Acquired Pneumonia
Source: MDPI journal article supplement (doi:10.3390/biology11030377), 2022-02-27

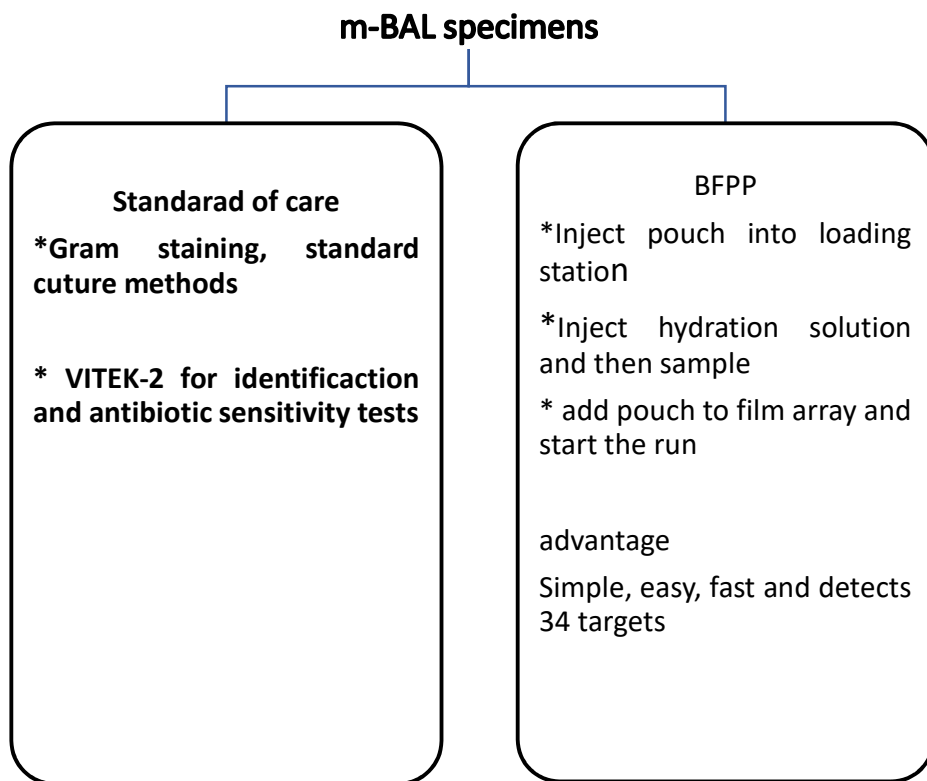

**Figure S1.** Laboratory workflow of mini-BAL specimens

Supplement: s1 [file s1]
